# Supplementary material for: 1.8 V Aqueous Symmetric Carbon-Based Supercapacitors with Agarose-Bound Activated Carbons in an Acidic Electrolyte
Source: Nanomaterials (Basel). 2021 Jun 30;11(7):1731. doi: 10.3390/nano11071731 (PMC8308127; doi:10.3390/nano11071731)
Supplement: Supplementary file 1 [file nanomaterials-11-01731-s001.zip › nanomaterials-1265309-supplementary.pdf]

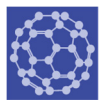

## Supplementary Materials: 1.8 V Aqueous Symmetric Carbon-Based Supercapacitors with Agarose-Bound Activated Carbons in an Acidic Electrolyte

Chih-Chung Lai <sup>1,†</sup>, Feng-Hao Hsu <sup>1,†</sup>, Su-Yang Hsu <sup>1,†</sup>, Ming-Jay Deng <sup>2,\*</sup>, Kueih-Tzu Lu <sup>1,\*</sup> and Jin-Ming Chen <sup>1,\*</sup>

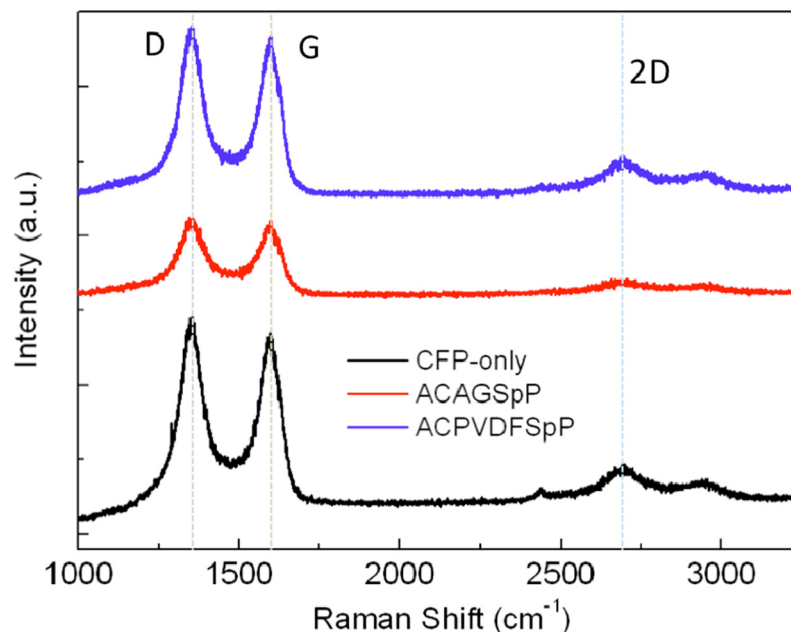

**Figure S1.** Raman spectra of as-prepared electrodes of CFP-only (black), ACAGSpP (red), and ACPVDFSpP (blue) (Probed by 532 nm laser).

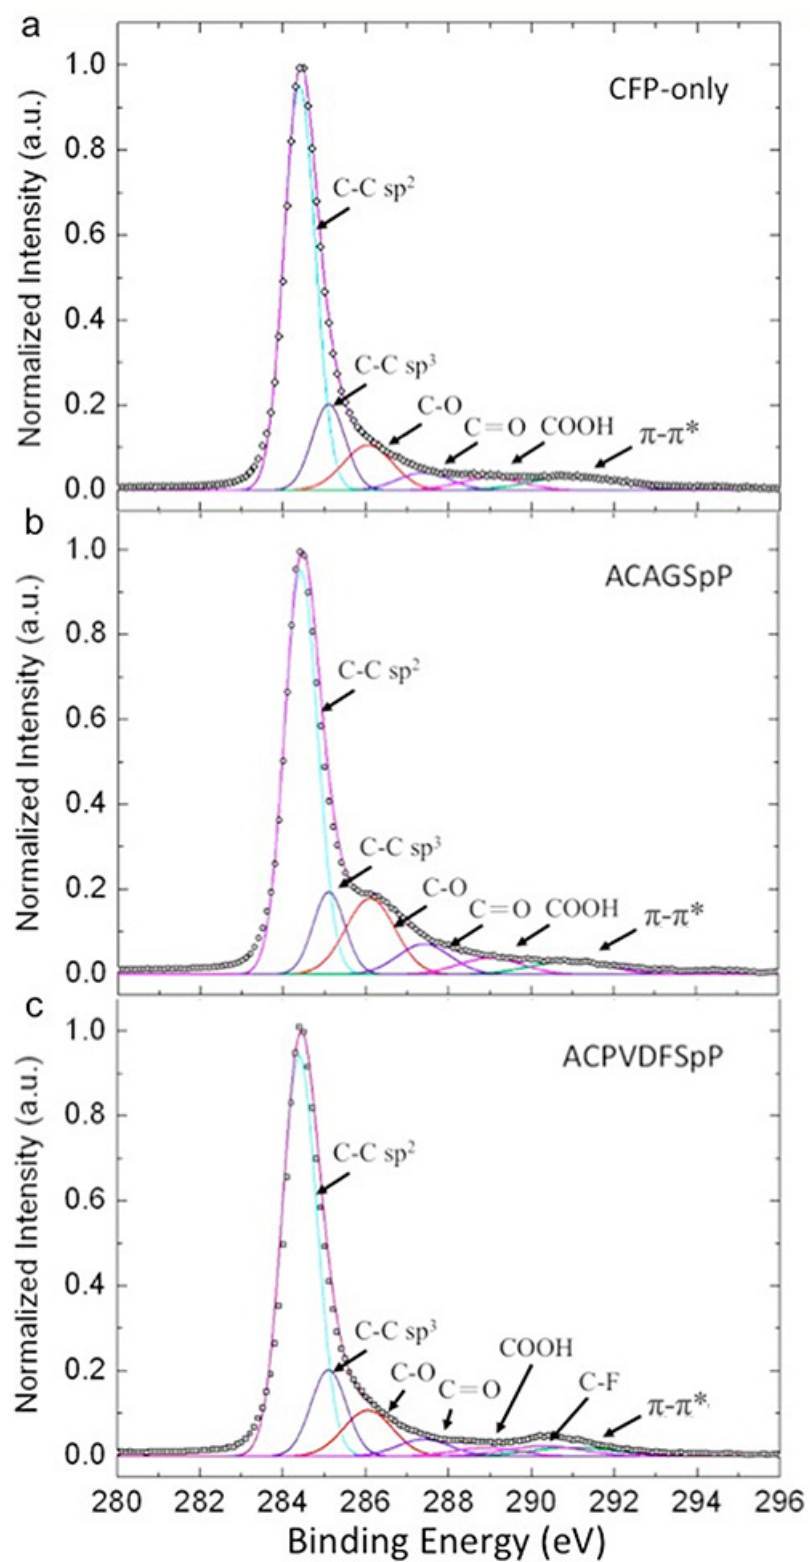

**Figure S2.** Fitted XPS spectra in C1s of (a) CFP-only, (b) ACAGSpP and (c) ACPVDFSpP electrodes. The peaks' intensities are normalized according to that of C-C  $sp^2$  (284.4 eV) in each sample.

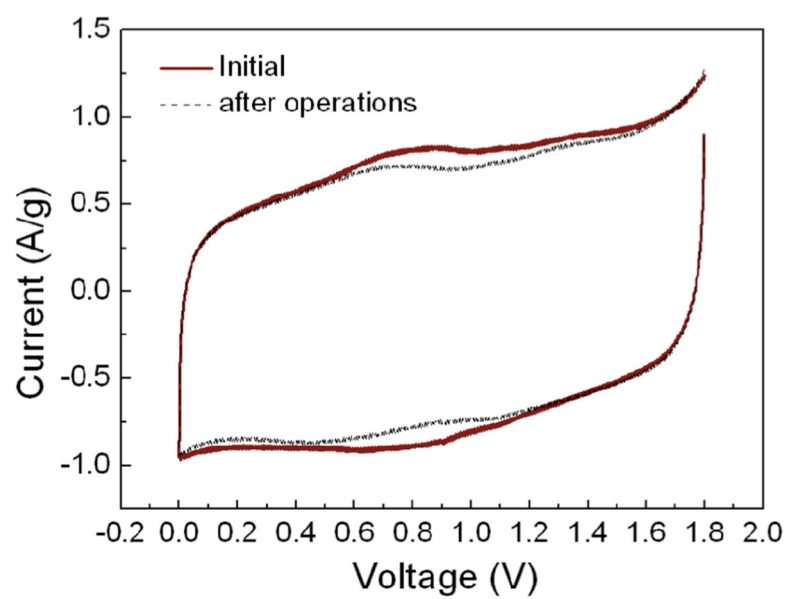

**Figure S3.** CV curves of ACPVDFSpP-decorated CFCs at initial (brown line) and after operation for several cycles (black dashed line). [Scan rate is 50 mV/sec].

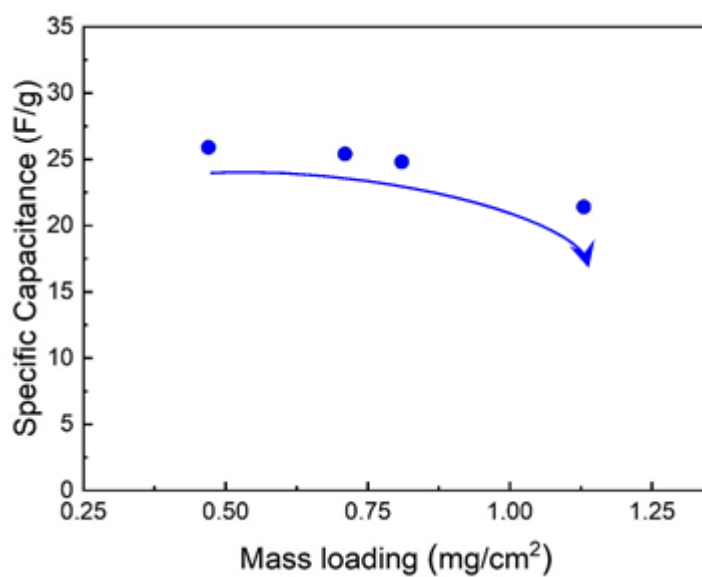

**Figure S4.** Specific capacitance of the ACAGSpP electrodes at various mass loading on CFCs. The active area is fixed to be 1 × 1.5 cm<sup>2</sup> for all the cases.

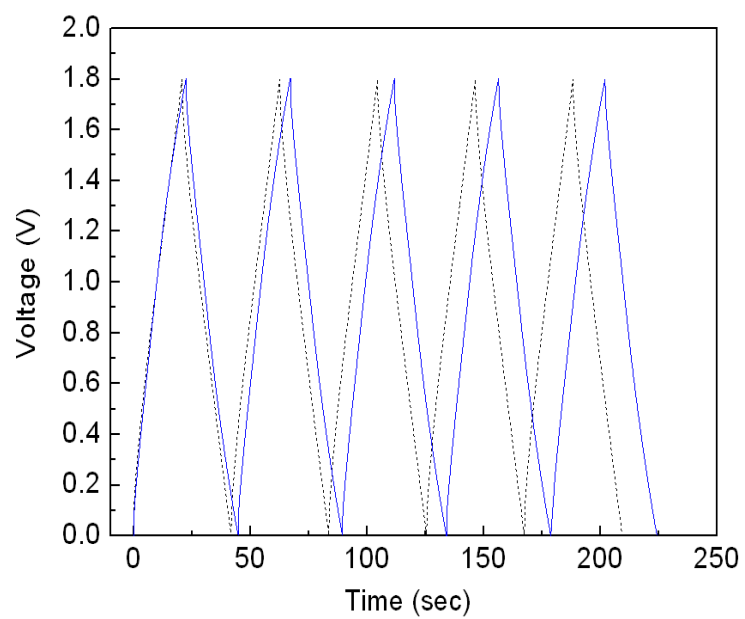

**Figure S5.** The first five (blue solid line) and last five (black dashed line) galvanostatic charge/discharge curves of symmetric aqueous SCs employing ACAGSpP electrodes at 2 A/g for 10,000 cycles.
